# Supplementary material
Source: PubMed Central journal article supplement (PMC6999437)
Supplement: ELSC-18-169-s001.pdf [file ELSC-18-169-s001.pdf]

**Online supporting data:**

Table 1: Comparison of cavitation detection from experiment and simulation.

| Detection method |       | Flow rate, mL min <sup>-1</sup> |      |    |        |     |      |     |     |
|------------------|-------|---------------------------------|------|----|--------|-----|------|-----|-----|
|                  |       | 8                               | 9    | 10 | 11*    | 12  | 16   | 20  | 26  |
| Experimental     | Noise | no                              | no   | no | no     | yes | yes  | yes | yes |
|                  | TPA   | no                              | no   | no | no     | yes | yes  | yes | yes |
| CFD model        |       | no                              | n.d. | no | yes/no | yes | n.d. | yes | yes |

\*Several cells at the beginning of the reduction contained a small amount of vapor. n.d., not determined.
